# Supplementary material for: Seasonally frugivorous forest birds and window collision fatalities: novel integration of bird counts in fall improves assessment of species vulnerability to collisions
Source: PeerJ journal article supplement (doi:10.7717/peerj.19943), 2025-08-29
Supplement: Supplementary_Table_S1.docx [file Supplementary_Table_S1.docx]

**Supplemental Table S1.** Models tested to determine whether season or year influenced the carcass detectability by the surveyors, with their respective parameters for intercept (*p* formula) and slope (*k* formula). As the null model had a ΔAICc < 2, we concluded that the season or year did not explain variation in our data.

| Model | *p* Formula | *k* Formula | AICc | ΔAICc | Weight |
| --- | --- | --- | --- | --- | --- |
| 12 | *p ~ 1* | *k ~ Season* | 118.92 | 0 | 0.3732 |
| **16** | ***p ~ 1*** | ***k ~ 1*** | **119.79** | **0.87** | **0.2416** |
| 4 | *p ~ 1* | *k ~ Season + Year* | 120.85 | 1.93 | 0.1422 |
| 10 | *p ~ Year* | *k ~ Season* | 122.08 | 3.16 | 0.0769 |
| 11 | *p ~ Season* | *k ~ Season* | 123.22 | 4.3 | 0.0435 |
| 15 | *p ~ Season* | *k ~ 1* | 123.45 | 4.53 | 0.0388 |
| 14 | *p ~ Year* | *k ~ 1* | 124.39 | 5.47 | 0.0242 |
| 8 | *p ~ 1* | *k ~ Year* | 125.14 | 6.22 | 0.0166 |
| 2 | *p ~ Year* | *k ~ Season + Year* | 125.56 | 6.64 | 0.0135 |
| 3 | *p ~ Season* | *k ~ Season + Year* | 125.59 | 6.67 | 0.0133 |
| 9 | *p ~ Season + Year* | *k ~ Season* | 126.59 | 7.67 | 0.0081 |
| 13 | *p ~ Season + Year* | *k ~ 1* | 128.12 | 9.2 | 0.0038 |
| 7 | *p ~ Season* | *k ~ Year* | 129.43 | 10.51 | 0.0019 |
| 6 | *p ~ Year* | *k ~ Year* | 129.58 | 10.66 | 0.0018 |
| 1 | *p ~ Season + Year* | *k ~ Season + Year* | 132.29 | 13.37 | 0.0005 |
| 5 | *p ~ Season + Year* | *k ~ Year* | 133.98 | 15.06 | 0.0002 |
