# Supplementary material for: Seasonally frugivorous forest birds and window collision fatalities: novel integration of bird counts in fall improves assessment of species vulnerability to collisions
Source: PeerJ journal article supplement (doi:10.7717/peerj.19943), 2025-08-29
Supplement: Supplementary_Table_S2.docx [file Supplementary_Table_S2.docx]

**Supplemental Table S2.** Set of models used to estimate carcass persistence with its respective parameters for location (*l* formula) and scale (*s* formula). We tested models with different distributions and different combinations with season. The model in bold font was used to correct bird-window collision mortality estimates.

| Model | Distribution | *l* Formula | *s* Formula | AICc | ΔAICc | Weight |
| --- | --- | --- | --- | --- | --- | --- |
| 12 | loglogistic | *l~1* | *s~Season* | 380.04 | 0 | 0.2380 |
| 11 | loglogistic | *l~Season* | *s~Season* | 381.20 | 1.16 | 0.1333 |
| 4 | weibull | *l~1* | *s~Season* | 381.66 | 1.62 | 0.1059 |
| **6** | **weibull** | ***l~1*** | ***s~1*** | **381.90** | **1.86** | **0.0939** |
| 3 | weibull | *l~Season* | *s~Season* | 381.93 | 1.89 | 0.0925 |
| 2 | exponential | *l~1* | *NULL* | 382.25 | 2.21 | 0.0788 |
| 14 | loglogistic | *l~1* | *s~1* | 382.48 | 2.44 | 0.0703 |
| 5 | weibull | *l~Season* | *s~1* | 382.54 | 2.5 | 0.0682 |
| 1 | exponential | *l~Season* | *NULL* | 382.61 | 2.57 | 0.0658 |
| 13 | loglogistic | *l~Season* | *s~1* | 383.98 | 3.94 | 0.0332 |
| 8 | lognormal | *l~1* | *s~Season* | 385.84 | 5.8 | 0.0131 |
| 7 | lognormal | *l~Season* | *s~Season* | 387.28 | 7.24 | 0.0064 |
| 10 | lognormal | *l~1* | *s~1* | 392.71 | 12.67 | 0.0004 |
| 9 | lognormal | *l~Season* | *s~1* | 394.74 | 14.7 | 0.0002 |
