# Supplementary material for: Seasonally frugivorous forest birds and window collision fatalities: novel integration of bird counts in fall improves assessment of species vulnerability to collisions
Source: PeerJ journal article supplement (doi:10.7717/peerj.19943), 2025-08-29
Supplement: Supplementary_Table_S3.docx [file Supplementary_Table_S3.docx]

**Supplemental Table S3.** Set of models used to estimate searcher efficiency with its respective parameters for intercept (*p* formula) and slope (*k* formula). We tested models with different combinations with season. The model in bold font was used to correct bird-window collision mortality estimates.

| Model | *p* Formula | *k* Formula | AICc | ΔAICc | Weight |
| --- | --- | --- | --- | --- | --- |
| 2 | *p~1* | *k~Season* | 118.92 | 0 | 0.5354 |
| **4** | ***p~1*** | ***k~1*** | **119.79** | **0.87** | **0.3466** |
| 1 | *p~Season* | *k~Season* | 123.22 | 4.3 | 0.0624 |
| 3 | *p~Season* | *k~1* | 123.45 | 4.53 | 0.0556 |
