# Supplementary material for: Seasonally frugivorous forest birds and window collision fatalities: novel integration of bird counts in fall improves assessment of species vulnerability to collisions
Source: PeerJ journal article supplement (doi:10.7717/peerj.19943), 2025-08-29
Supplement: Supplementary_Table_S8.docx [file Supplementary_Table_S8.docx]

**Table S8:** Counts, corrected abundance estimates, and number of bird collisions recorded during the late winter 2021 season (January–February) at the University of Victoria (UVic), British Columbia, Canada. # Counted individuals UVic refers to the total number of individuals detected through point counts at UVic. Corrected abundance estimates were obtained using an abundance model that accounts for imperfect detection and incorporating behavioural factors such as flocking. Estimates are presented as means with associated 95% credible intervals. The # Collisions detected column shows the total number of carcasses found for each species during collision surveys.

| **Species name** | **# Counted individuals UVic** | **Corrected abundance UVic (95% CI)** | **Number of collisions detected** |
| --- | --- | --- | --- |
| American crow  *Corvus brachyrhynchos* | 11 | 31 (15-63) | 0 |
| American robin  *Turdus migratorius* | 128 | 211 (171-266) | 3 |
| Anna’s hummingbird  *Calypte anna* | 12 | 31 (15-65) | 1 |
| Bewick’s wren  *Thryomanes bewickii* | 9 | 20 (9-45) | 0 |
| Brown creeper  *Certhia americana* | 3 | 10 (3-31) | 0 |
| Bushtit  *Psaltriparus minimus* | 0 | 4 (1-21) | 0 |
| Canada goose  *Branta canadensis* | 0 | 4 (1-20) | 0 |
| Chestnut-backed chickadee  *Poecile rufescens* | 26 | 67 (41-109) | 0 |
| Common raven  *Corvis corax* | 14 | 34 (17-67) | 0 |
| Cooper’s hawk  *Astur cooperii* | 1 | 4 (1-19) | 0 |
| Dark-eyed junco  *Junco hyemalis* | 57 | 130 (90-188) | 0 |
| Downy woodpecker  *Dryobates pubescens* | 1 | 4 (1-18) | 0 |
| Eurasian-collared dove  *Streptopelia decaocto* | 0 | 4 (1-19) | 0 |
| European starling  *Sturnus vulgaris* | 0 | 4 (1-20) | 0 |
| Fox sparrow  *Passerella iliaca* | 11 | 31 (15-64) | 0 |
| Glaucous-winged gull  *Larus glaucescens* | 14 | 34 (17-68) | 0 |
| Golden-crowned kinglet  *Regulus satrapa* | 37 | 79 (51-122) | 1 |
| Golden-crowned sparrow  *Zonotrichia atricapilla* | 2 | 7 (2-26) | 0 |
| Hermit thrush  *Catharus guttatus* | 1 | 9 (1-37) | 1 |
| House finch  *Haemorhous mexicanus* | 12 | 34 (16-66) | 0 |
| Mallard  *Anas platyrhynchos* | 0 | 4 (1-20) | 0 |
| Merlin  *Falco columbarius* | 1 | 4 (1-20) | 0 |
| Northern flicker  *Colaptes auratus* | 2 | 7 (2-28) | 0 |
| Pacific wren  *Troglodytes pacificus* | 4 | 12 (4-35) | 0 |
| Pileated woodpecker  *Dryocopus pileatus* | 0 | 4 (1-18) | 0 |
| Pine siskin  *Spinus pinus* | 20 | 36 (25-54) | 0 |
| Purple finch  *Haemorhous purpureus* | 2 | 7 (2-25) | 0 |
| Red-breasted nuthatch  *Sitta canadensis* | 3 | 10 (3-31) | 0 |
| Red crossbill  *Loxia curvirostra* | 21 | 27 (18-44) | 0 |
| Red-tailed hawk  *Buteo jamaicensis* | 2 | 7 (2-25) | 0 |
| Ruby-crowned kinglet  *Corthylio calendula* | 6 | 18 (7-44) | 0 |
| Sharp-shinned hawk  *Accipiter striatus* | 0 | 4 (1-19) | 0 |
| Song sparrow  *Melospiza melodia* | 2 | 7 (2-27) | 0 |
| Spotted towhee  *Pipilo maculatus* | 12 | 29 (14-60) | 0 |
| Steller’s jay  *Cyanocitta stelleri* | 0 | 4 (1-19) | 0 |
| Varied thrush  *Ixoreus naevius* | 1 | 4 (1-19) | 0 |
